# Supplementary material
Source: Royal Society of Chemistry journal article supplement (doi:10.1039/d6tc00472e)
Supplement: d6tc00472e1.pdf [file d6tc00472e1.pdf]

## Enhancing the Strength Organo Hybrid SiO<sub>2</sub> Aerogels with Ultra Low Dielectric Properties

Zhou Yan<sup>a</sup>, Yang Wei<sup>a</sup>, Yang Yuke<sup>a</sup>, Huang Jin<sup>a</sup>, Liu Guangyao<sup>b</sup>, Zhao Yinqiao<sup>b</sup>, Junxiao Yang<sup>a\*</sup>

a. School of Materials and Chemistry and State Key Laboratory of Environmentally-friendly Energy  
Materials, Southwest University of Science and Technology, Mianyang 621010, China.

b. Sichuan Zhongwu Co., Ltd., Mianyang 622550, China.

† Corresponding Authors: Junxiao Yang (yangjunxiao@swust.edu.cn)

### CONTENTS

**Page 2: Fig. S1:** the FTIR spectra of hybrid BCB-D aerogels modified and cured **with 10 wt % and 10 wt %**

**Page 3: Fig. S2:** the FTIR spectra of hybrid BCB-D aerogels modified and cured **with 20 wt % and 2 wt %**

**Page 4: Fig. S3:** the FTIR spectra of hybrid BCB-D aerogels modified and cured **with 20 wt % and 10 wt % BCB-T**

**Page 5: Fig. S4:** the FTIR spectra of hybrid BCB-T aerogels modified and cured with **10 wt % and 2 wt % BCB-T**

**Page 6: Fig. S5:** Changes in commercial silica aerogels and hybrid BD10-2 aerogels under  
different weight pressures

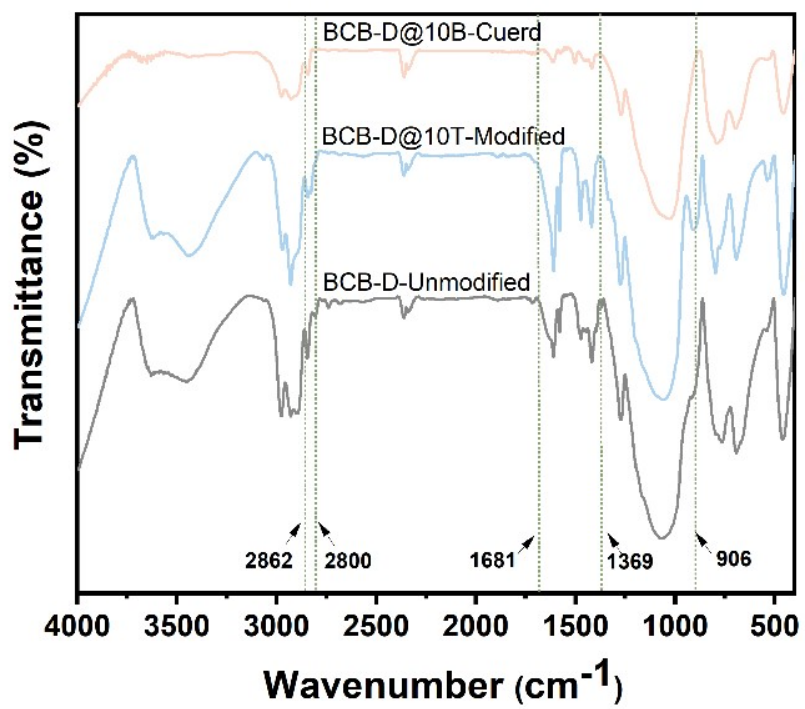

Fig. S1. the FTIR spectra of hybrid BCB-D aerogels modified and cured with 10 wt % and 10 wt % BCB-T

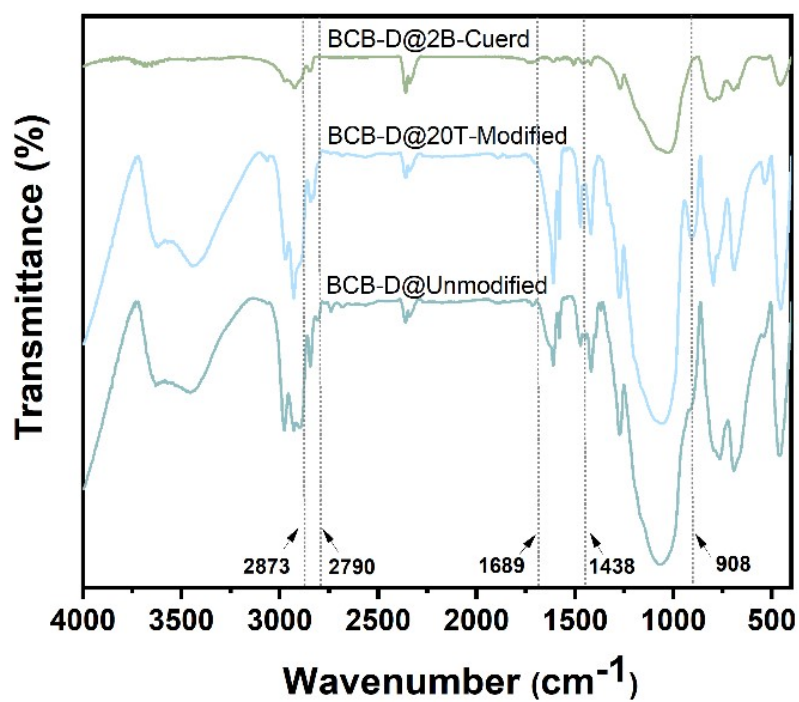

Fig. S2. the FTIR spectra of hybrid **BCB-D** aerogels modified and cured with **20 wt %** and **2 wt %**  
**BCB-T**

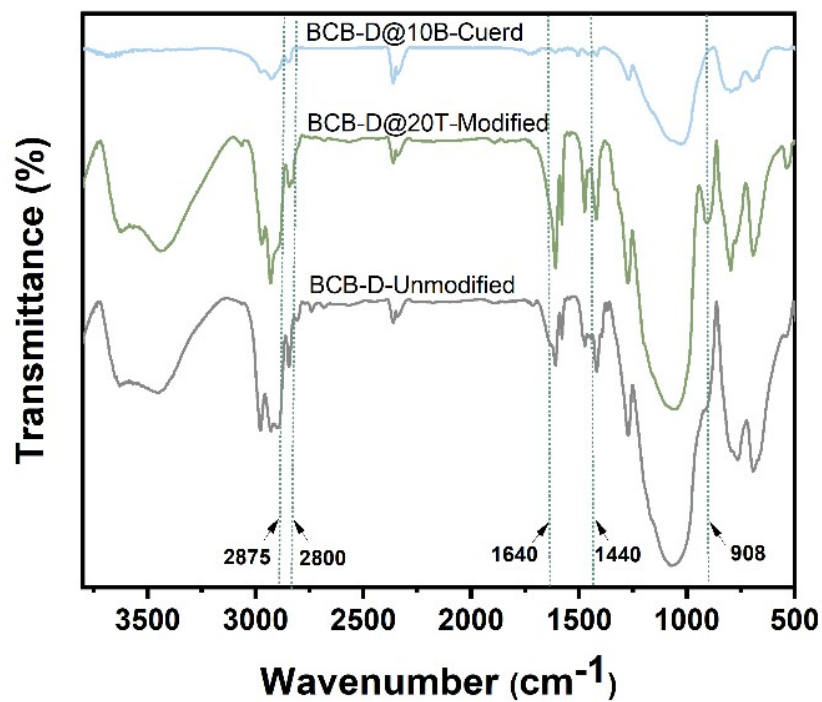

Fig. S3. the FTIR spectra of hybrid BCB-D aerogels modified and cured with 20 wt % and 10 wt %  
BCB-T

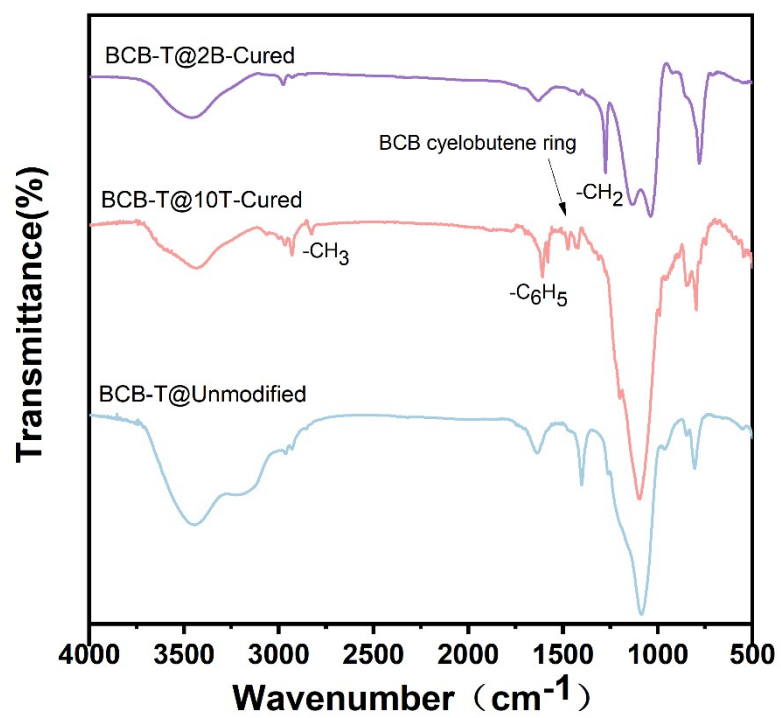

Fig. S4. the FTIR spectra of hybrid BCB-T aerogels modified and cured with **10 wt % and 2 wt %**  
**BCB-T**

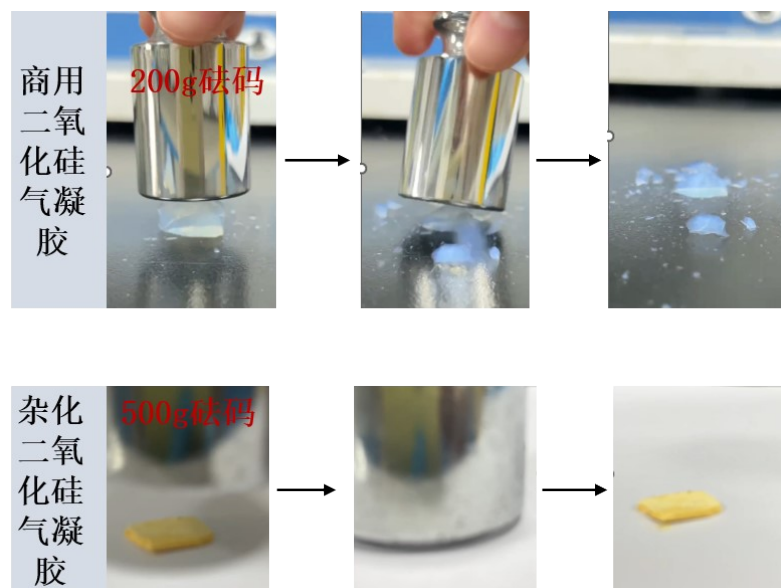

**Fig. S5** Changes in commercial silica aerogels and hybrid BD10-2 aerogels under different weight pressures
